# Supplementary material for: Fabrication of bimetallic MOF-74 derived materials for high-efficiency adsorption of iodine
Source: Royal Society of Chemistry journal article supplement (doi:10.1039/d4dt01554a), 2024-01-01
Supplement: d4dt01554a1.pdf [file d4dt01554a1.pdf]

## Supporting Information

### Fabrication of bimetallic MOF-74 derived materials for high-efficient adsorption of iodine

Wen-Ze Li,<sup>a</sup> Fu-Yu Guo,<sup>a</sup> Jing Li,<sup>a</sup> Xiao-Sa Zhang,<sup>a</sup> Yu Liu,<sup>a</sup> and Jian Luan<sup>\*a</sup>

<sup>a</sup> College of Science, Shenyang University of Chemical Technology, Shenyang, 110142, P. R. China

E-mail: [2010044@stu.neu.edu.cn](mailto:2010044@stu.neu.edu.cn) (J. Luan)

**Table S1** Analysis of metal components in bimetallic MOF-74 system and pyrolyzed Mn-Ni-CX samples by ICP-AES.

| Samples      | Element | Wt.%   |
|--------------|---------|--------|
| Mn-Zn-MOF-74 | Mn      | 12.288 |
|              | Zn      | 10.157 |
| Mn-Co-MOF-74 | Mn      | 9.517  |
|              | Co      | 12.280 |
| Mn-Ni-MOF-74 | Mn      | 8.159  |
|              | Ni      | 12.790 |
| Mn-Ni-C200   | Mn      | 9.541  |
|              | Ni      | 15.279 |
| Mn-Ni-C400   | Mn      | 15.794 |
|              | Ni      | 25.318 |
| Mn-Ni-C600   | Mn      | 20.516 |
|              | Ni      | 33.417 |

## Supporting Information

**Table S2** Comparison of adsorption effect of Mn-Ni-C400 and other materials in iodine solution and iodine vapor.

| Materials  | Adsorbed state of iodine | Adsorption capacity (mg g <sup>-1</sup> ) | Reference |
|------------|--------------------------|-------------------------------------------|-----------|
| MOF-5      | Solution                 | 155                                       | S1        |
| Cu-MOF     | Solution                 | 144                                       | S2        |
| Mn-Ni-C400 | Solution                 | 210                                       | This work |
| Cu-MOF     | Vapor                    | 610                                       | S2        |
| Ni-MOF     | Vapor                    | 640                                       | S3        |
| Mn-Ni-C400 | Vapor                    | 720                                       | This work |

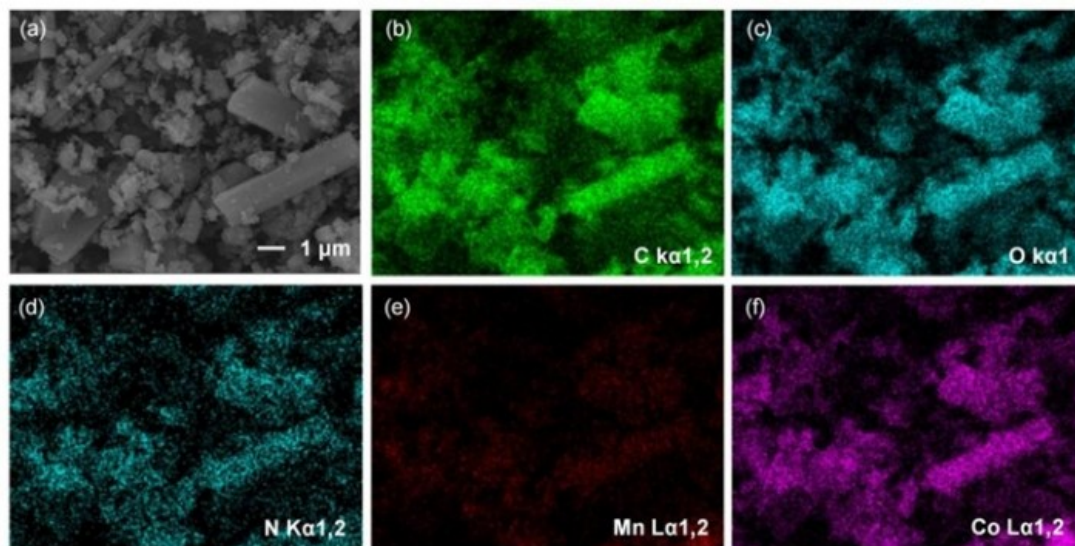

**Fig. S1** (a) SEM images of Mn-Co-MOF-74. (b–g) EDX elemental distribution mapping images of Mn-Co-MOF-74.

## Supporting Information

---

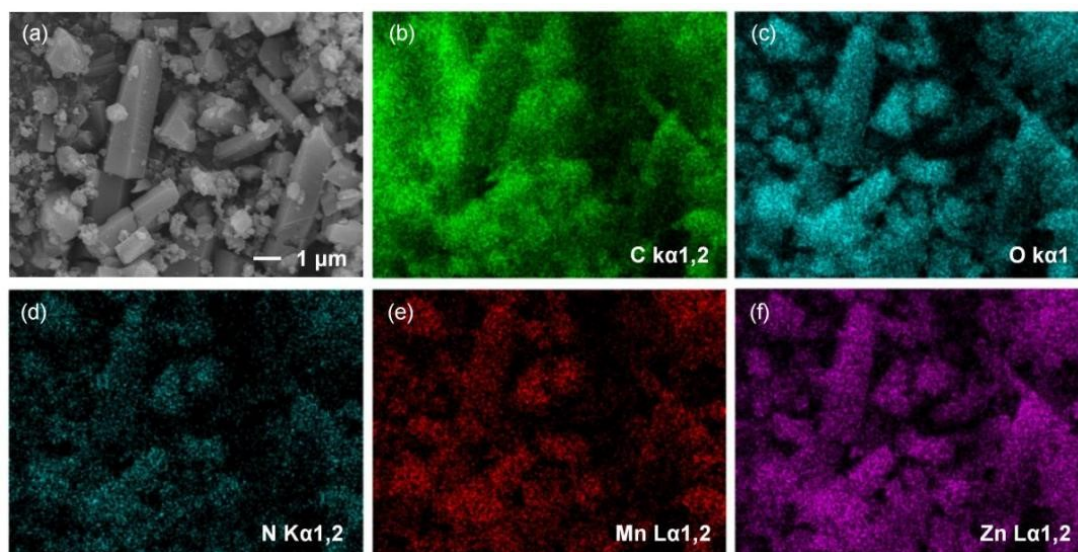

**Fig. S2** (a) SEM images of Mn-Zn-MOF-74. (b–g) EDX elemental distribution mapping images of Mn-Zn-MOF-74.

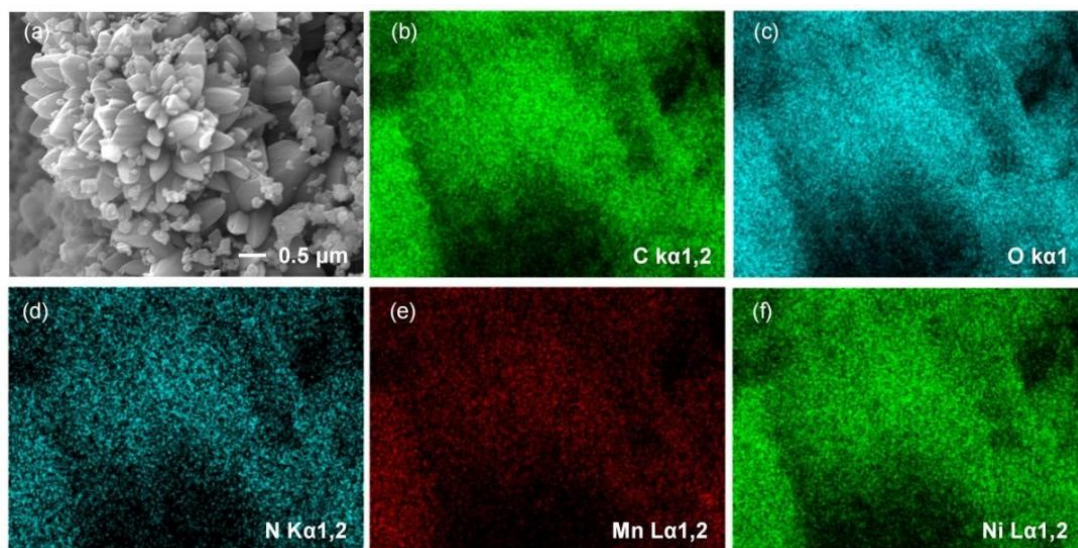

**Fig. S3** (a) SEM images of Mn-Ni-C200. (b–g) EDX elemental distribution mapping images of Mn-Ni-C200.

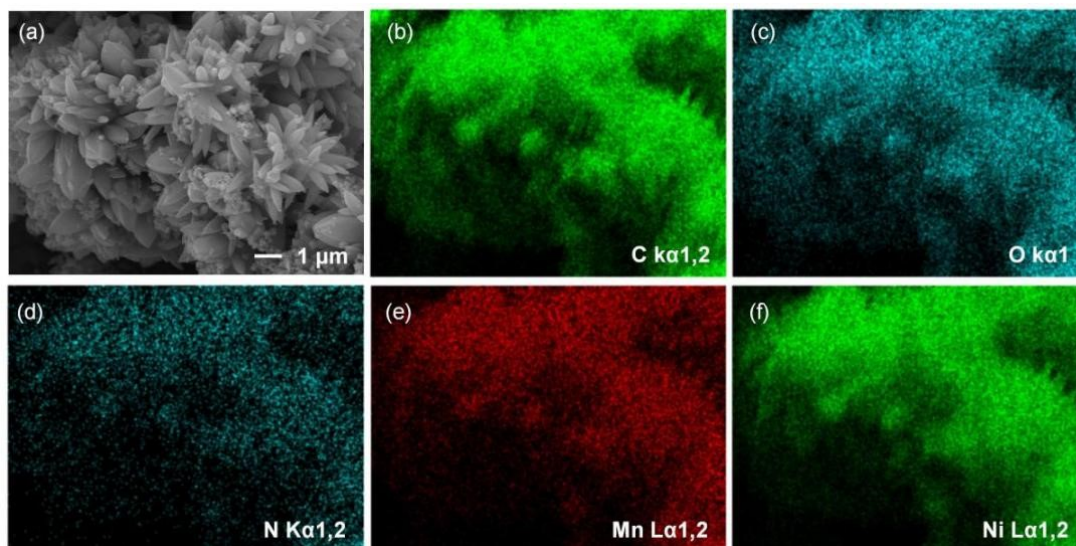

**Fig. S4** (a) SEM images of Mn-Ni-C600. (b–g) EDX elemental distribution mapping images of Mn-Ni-C600.

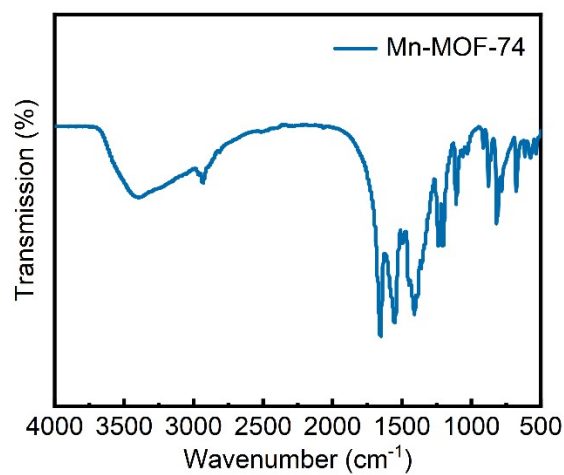

**Fig. S5** FTIR spectrum of monometallic Mn-MOF-74.

## Supporting Information

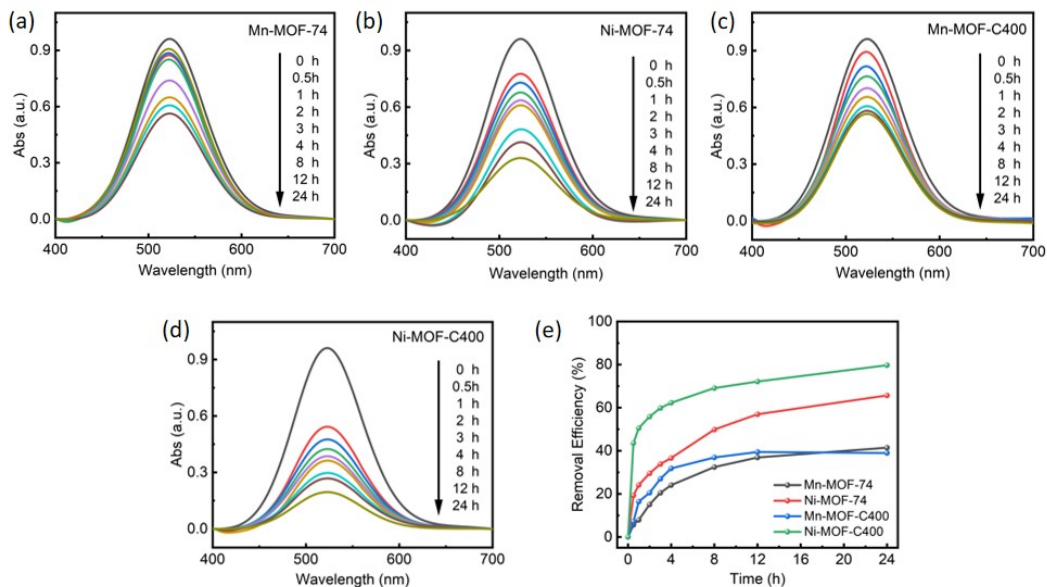

**Fig. S6** UV-Vis spectra at different temperatures in iodine-cyclohexane solution at 0.001 mol/L concentration: (a) Mn-MOF-74, (b) Ni-MOF-74, (c) Mn-MOF-C400, (d) Ni-MOF-C400; (e) Removal efficiency.

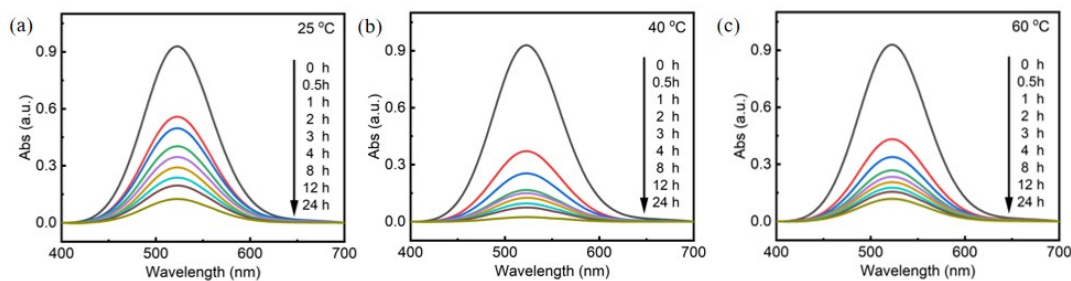

**Fig S7** UV-Vis spectra at different temperatures in iodine-cyclohexane solution at 0.001 mol/L concentration: (a) Mn-Ni-C200, (b) Mn-Ni-C400, (c) Mn-Ni-C600.

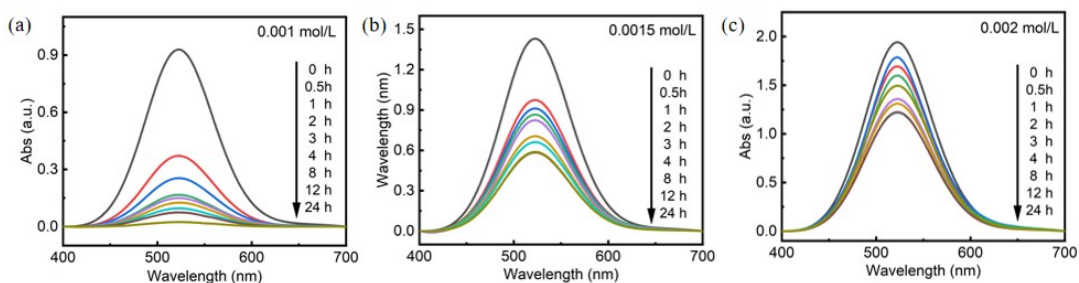

**Fig S8** UV-Vis spectra of Mn-Ni-C400 solution with different concentrations of iodine-cyclohexane at 60 °C: (a) 0.001 mol L<sup>-1</sup>, (b) 0.0015 mol L<sup>-1</sup>, (c) 0.002 mol L<sup>-1</sup>.

## Supporting Information

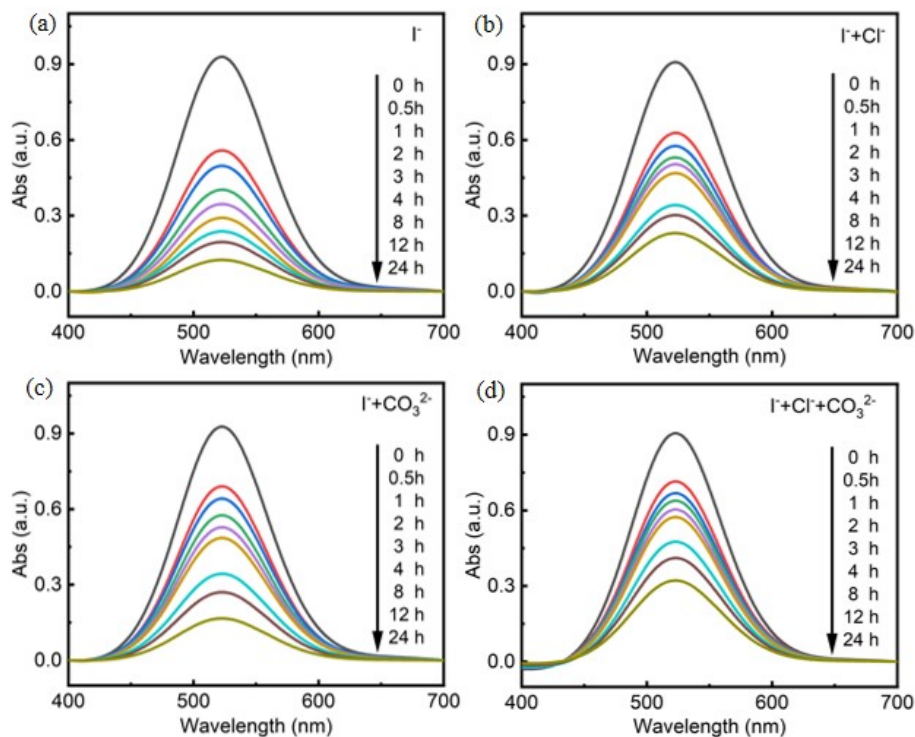

**Fig S9** UV-Vis spectra of Mn-Ni-C400 with 0.001 mol L<sup>-1</sup> iodine solution added to different interfering ions at 60 °C: (a) I<sup>-</sup>, (b) I<sup>-</sup> and Cl<sup>-</sup>, (c) I<sup>-</sup> and CO<sub>3</sub><sup>2-</sup>, (d) I<sup>-</sup> and Cl<sup>-</sup> and CO<sub>3</sub><sup>2-</sup>.

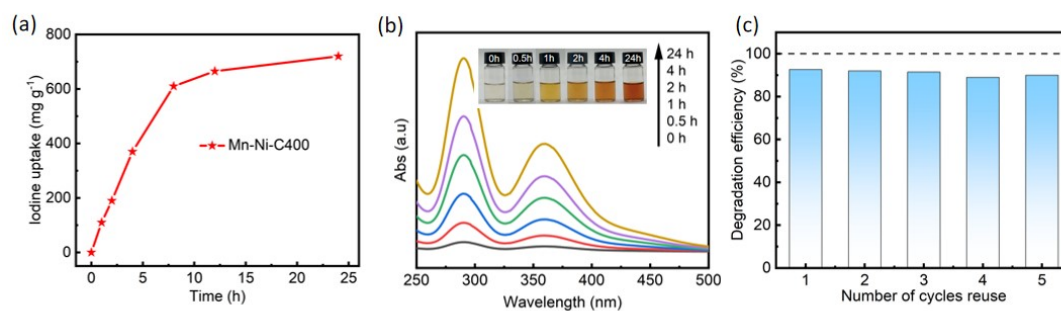

**Fig. S10** (a) Iodine vapor experiment of Mn-Ni-C400; (b) The desorption experiment of Mn-Ni-C400@I; (c) Recyclability of Mn-Ni-C400 (after desorption with anhydrous ethanol) for iodine vapor capture.

## Supporting Information

---

### Reference:

S1 R. L. Yu, Q. F. Li, T. Zhang, Z. L. Li and L. Z. Xia, *Process Saf. Environ.*, 2023, **174**, 770–777.

S2 M. Li, G. Y. Yuan, Y. Zeng, Y. Y. Yang, J. L. Liao, J. J. Yang and N. Liu, *J. Radioanal. Nucl. Ch.*, 2020, **324**, 1167–1177.

S3 J. Y. Xian, Z. Y. Huang, X. X. Xie, C. J. Lin, X. J. Zhang, H. Y. Song and S. R. Zheng, *Chin. J. Struct. Chem.*, 2023, **42**, 100005.
